# Supplementary material for: Specific Variants in the MLH1 Gene Region May Drive DNA Methylation, Loss of Protein Expression, and MSI-H Colorectal Cancer
Source: PLoS One. 2010 Oct 13;5(10):e13314. doi: 10.1371/journal.pone.0013314 (PMC2954166; doi:10.1371/journal.pone.0013314)
Supplement: File S1 — List of all SNPs genotyped in Ontario, Newfoundland and Seattle samples. (0.06 MB XLS) [file pone.0013314.s001.xls]

## Sheet: ON
snp	enzyme	chr_position_126	gene_126	gene region	minorAllele-B	majorAllele-A	AA	AB	BB	hwe	call rate for controls per enzyme	minor allele freq
rs6550433	nsp-500k	36792332	intergenic		A	T	369	462	130	0.491534	0.996888	0.37565
rs11927951	nsp-500k	36792615	intergenic		G	C	369	460	133	0.631042	0.997925	0.377339
rs1472862	nsp-500k	36800143	intergenic		A	G	472	368	99	0.0362717	0.974066	0.301384
rs1472863	sty-500k	36800537	intergenic		G	A	691	185	12	1	0.963124	0.11768
rs4075977	nsp-500k	36803662	intergenic		T	C	756	195	13	0.874099	1	0.114627
rs885164	nsp-500k	36804255	intergenic		T	C	479	378	105	0.0226209	0.997925	0.305613
rs987190	sty-500k	36804984	intergenic		G	A	639	235	25	0.532364	0.975054	0.158509
rs7648754	sty-500k	36807086	intergenic		G	A	407	386	123	0.0408369	0.993492	0.344978
rs17035616	sty-500k	36808793	intergenic		?	A	915	0	0	1	0.992408	0
rs9311137	nsp-500k	36817888	intergenic		T	G	517	380	36	0.000689147	0.967842	0.242229
rs931913	nsp-500k	36818153	intergenic		A	G	391	445	126	1	0.997925	0.362266
rs10510689	xba-100k	36821298	intergenic		C	T	821	36	2	0.0728799	1	0.0232829
rs9311138	xba-100k	36822275	intergenic		A	G	681	160	15	0.119855	0.996508	0.110981
rs2063158	sty-500k	36823664	intergenic		C	T	908	1	0	1	0.9859	0.000550055
rs7646626	nsp-500k	36823920	intergenic		C	T	498	390	76	1	1	0.28112
rs906482	sty-500k	36831332	intergenic		A	G	368	426	128	0.777897	1	0.369848
rs1553656	sty-500k	36834709	intergenic		T	C	246	436	180	0.631823	0.934924	0.461717
rs1532964	xba-100k	36835547	intergenic		A	G	483	322	54	1	1	0.250291
rs1006834	sty-500k	36836485	intergenic		A	T	358	432	128	0.943871	0.995662	0.374728
rs4624519	nsp-500k	36837984	intergenic		T	C	381	449	131	1	0.996888	0.369927
rs9917659	nsp-500k	36839164	intergenic		G	A	536	367	61	0.932218	1	0.253631
rs4431050	sty-500k	36855688	LBA1	Intron 8	A	G	583	173	4	0.0153594	0.824295	0.119079
rs4431050	TaqMan	36855688	LBA1	Intron 8	A	G	861	230	7		1	0.111111
rs9882911	sty-500k	36860396	LBA1	Intron 7	C	T	380	419	122	0.720675	0.998915	0.359935
rs9985296	nsp-500k	36864625	LBA1	Intron 5	T	C	336	575	0	2.71056e-60	0.945021	0.315587
rs3733032	sty-500k	36867413	LBA1	Intron 5	?	G	919	0	0	1	0.996746	0
rs3733033	sty-500k	36867590	LBA1	Intron 5	G	A	688	156	8	1	0.924078	0.100939
rs17807744	sty-500k	36869052	LBA1	Intron 3	T	C	482	245	0	2.1454e-11	0.788503	0.168501
rs6550436	sty-500k	36885935	LBA1	Intron 8	?	A	903	0	0	1	0.979393	0
rs6808230	nsp-500k	36886601	LBA1	Intron 8	C	T	551	339	74	0.0331979	1	0.252593
rs7649846	nsp-500k	36889962	LBA1	Intron 8	T	C	548	338	72	0.0586748	0.993776	0.251566
rs9810132	nsp-500k	36895054	LBA1	Intron 7	A	G	549	339	71	0.0709208	0.994813	0.250782
rs11129740	sty-500k	36900198	LBA1	Intron 7	A	C	524	331	66	0.18862	0.998915	0.251357
rs6765624	nsp-500k	36902550	LBA1	Intron 7	A	G	553	337	71	0.0575317	0.996888	0.24922
rs17035714	nsp-500k	36906678	LBA1	Intron 6	C	T	926	1	0	1	0.961618	0.000539374
rs6781803	hind-100k	36912525	LBA1	Intron 3	A	G	477	291	66	0.0278116	1	0.253597
rs4328757	sty-500k	36913184	LBA1	Intron 3	C	T	353	357	159	8.27479e-05	0.942516	0.388377
rs4528889	sty-500k	36914098	LBA1	Intron 3	G	A	619	260	43	0.0300448	1	0.187636
rs6550440	hind-100k	36914290	LBA1	Intron 3	A	G	475	291	66	0.0279944	0.997602	0.254207
rs6550440	sty-500k	36914290	LBA1	Intron 3	A	G	517	333	65	0.256315	0.992408	0.253005
rs9864910	sty-500k	36915745	LBA1	5' UTR	T	G	520	297	56	0.131118	0.946855	0.23425
rs7614265	xba-100k	36919082	LBA1	Intron 2	C	T	819	39	1	0.386681	1	0.023865
rs6769189	nsp-500k	36933777	LBA1		A	G	699	234	21	0.793323	0.989627	0.144654
rs6769400	nsp-500k	36933999	LBA1		A	G	291	474	183	0.742072	0.983402	0.443038
rs7622114	nsp-500k	36935664	LBA1		C	A	333	457	174	0.427456	1	0.417531
rs6777094	nsp-500k	36951930	LBA1		T	A	278	435	193	0.348439	0.939834	0.453091
rs9311145	nsp-500k	36957900	LBA1		?	C	964	0	0	1	1	0
rs13421	par-10k	36960883	LBA1		T	C	329	398	135	0.430158	0.891417	0.387471
rs17035812	sty-500k	36969947	intergenic		A	G	833	84	1	0.716106	0.995662	0.046841
rs17202548	sty-500k	36970991	intergenic		T	A	292	429	179	0.343623	0.976139	0.437222
rs9311148	xba-100k	36971877	intergenic		G	T	856	1	0	1	0.997672	0.000583431
rs6768108	sty-500k	36973759	intergenic		T	C	298	445	175	0.687307	0.995662	0.433007
rs17035828	nsp-500k	36989727	intergenic		G	C	954	1	0	1	0.990664	0.00052356
rs6793689	nsp-500k	36999016	intergenic		G	A	945	1	0	1	0.981328	0.000528541
rs6769652	nsp-500k	36999394	intergenic		G	C	956	1	0	1	0.992739	0.000522466
rs6789043	ill-1536	37000871	intergenic		C	T	291	506	234	0.617598	1	0.472357
rs9311149	sty-500k	37005179	EPM2AIP1	3' UTR	C	A	252	449	221	0.468205	1	0.483189
rs9311149	xba-100k	37005179	EPM2AIP1	3'UTR	C	A	234	403	222	0.0758995	1	0.493015
rs4678557	xba-100k	37005233	EPM2AIP1	3'UTR	?	T	859	0	0	1	1	0
rs1800734	ill-1536	37009950	MLH1/EPM2AIP1	promoter	A	G	643	334	54	0.229082	1	0.214355
rs1800734	TaqMan	37009950	MLH1/EPM2AIP1	promoter	A	G	687	352	59	0.126874	1	0.214026
rs2020872	par-10k	37010136	MLH1	Exon 1 (I32V)	?	A	966	0	0	1	0.998966	0
rs1540354	sty-500k	37019493	MLH1	Intron 3	T	A	570	270	25	0.366364	0.938178	0.184971
rs4647256	sty-500k	37025329	MLH1	Exon 6 (N158N)	?	C	919	0	0	1	0.996746	0
rs1799977	ill-1536	37028572	MLH1	Exon 8 (I219V)	?	?	0	0	0	0	0	#DIV/0!
rs1799977	TaqMan	37028572	MLH1	Exon 8 (I219V)	G	A	514	485	99	0.324955	1	0.31102
rs4647263	hind-100k	37031499	MLH1	Intron 9	G	A	833	1	0	1	1	0.00059952
rs4647269	sty-500k	37032595	MLH1	Intron 9	T	C	283	458	179	0.841209	0.997831	0.443478
rs4647278	nsp-500k	37033779	MLH1	Intron 9	G	T	949	10	0	1	0.994813	0.00521376
rs3774339	sty-500k	37037858	MLH1	Intron 11	T	C	280	458	179	0.789118	0.994577	0.444929
rs3774332	ill-1536	37049672	MLH1	Intron 13	G	A	874	148	9	0.294841	1	0.0805044
rs9876420	nsp-500k	37051463	MLH1	Intron 13	T	G	796	49	0	1	0.876556	0.0289941
rs748766	nsp-500k	37057878	MLH1	Intron 14	C	T	305	473	186	0.947837	1	0.438278
rs9876116	TaqMan	37058744	MLH1	Intron 14 (IVS14-19)	G	A	355	538	205	0.951038	1	0.431694
rs2241031	nsp-500k	37065278	MLH1	Intron 17	T	C	297	469	187	0.947677	0.988589	0.442288
rs2020873	par-10k	37067029	MLH1	Exon 19 (H718Y)	?	C	962	0	0	1	0.994829	0
rs749072	TaqMan	37071028	LRRFIP2	Intron 26 (IVS26-18)	C	T	616	407	75	0.474024	1	0.253643
rs3774326	sty-500k	37074570	LRRFIP2	Intron 25	A	G	284	457	179	0.893703	0.997831	0.442935
rs6773787	sty-500k	37075510	LRRFIP2	Intron 24	C	G	921	1	0	1	1	0.000542299
rs11720064	nsp-500k	37076523	LRRFIP2	Intron 24	T	G	304	473	184	1	0.996888	0.437565
rs1468712	sty-500k	37081017	LRRFIP2	Intron 23	C	T	286	456	180	1	1	0.442516
rs7639375	hind-100k	37082026	LRRFIP2	Intron 23	A	C	265	373	163	0.131803	0.960432	0.43633
rs9311151	hind-100k	37082134	LRRFIP2	Intron 23	C	A	825	6	0	1	0.996403	0.00361011
rs7651033	nsp-500k	37091046	LRRFIP2	Intron 20	T	C	278	471	184	0.596599	0.967842	0.449625
rs2302504	nsp-500k	37091390	LRRFIP2	Intron 20	T	G	298	476	189	1	0.998963	0.443406
rs17204801	sty-500k	37118438	LRRFIP2	Intron 15	A	G	286	454	179	1	0.996746	0.441785
rs6800554	sty-500k	37118883	LRRFIP2	Intron 15	T	C	247	452	213	0.842318	0.989154	0.48136
rs17035994	nsp-500k	37157721	LRRFIP2	Intron 2	A	G	948	4	0	1	0.987552	0.00210084
rs336601	nsp-500k	37159477	LRRFIP2	Intron 2	A	G	513	374	77	0.46596	1	0.273859
rs6550458	nsp-500k	37163322	LRRFIP2	Intron 2	A	T	268	469	202	0.947715	0.974066	0.464856
rs9869432	nsp-500k	37171605	LRRFIP2	Intron 1	C	T	303	474	187	0.947934	1	0.439834
rs9823617	nsp-500k	37174354	LRRFIP2	Intron 1	T	A	295	465	175	0.790194	0.969917	0.435829
rs9828017	nsp-500k	37174809	LRRFIP2	Intron 1	T	A	951	9	0	1	0.995851	0.0046875
rs6786857	sty-500k	37180019	LRRFIP2	Intron 1	T	C	734	145	0	0.00277057	0.953362	0.0824801
rs1392749	sty-500k	37180195	LRRFIP2	Intron 1	T	C	285	457	180	0.946795	1	0.443059
rs1392746	hind-100k	37199819	intergenic		G	A	830	1	0	1	0.996403	0.000601685
rs11711937	sty-500k	37199842	intergenic		G	C	285	457	178	0.893633	0.997831	0.441848
rs13098279	TaqMan	37207462	intergenic		A	G	696	348	54	0.232805	1	0.20765
rs9831012	nsp-500k	37217431	intergenic		C	G	951	11	0	1	0.997925	0.00571726
rs9874437	nsp-500k	37241682	intergenic		T	C	258	484	221	0.89727	0.998963	0.480789
rs7639607	sty-500k	37244043	intergenic		C	T	240	458	208	0.739617	0.982646	0.48234
rs4678562	nsp-500k	37257074	intergenic		T	C	305	485	155	0.109598	0.98029	0.420635
rs6800842	sty-500k	37264608	GOLGA4	Intron 1	A	G	292	476	153	0.0916915	0.998915	0.424539
rs17036181	sty-500k	37277760	GOLGA4	Intron 2	C	T	850	65	1	1	0.993492	0.0365721

## Sheet: NL and SEA
iSELECT snps that are 500kb upstream and downstream of this chr3 region (rs1800734)
NWF
snp	enzyme	chr_position_126	gene_126	minorAllele-B	majorAllele-A	AA	AB	BB	hwe	call rate for controls per enzyme	minor allele freq
rs6781630	iSELECT	36561025	STAC	T	G	234	101	7	0.43736	1	0.168129
rs6550425	iSELECT	36566207		A	G	82	179	81	0.448907	1	0.498538
rs11716822	iSELECT	36566673		G	A	234	101	7	0.43736	1	0.168129
rs1357069	iSELECT	36567042		G	A	234	101	7	0.43736	1	0.168129
rs1357070	iSELECT	36567136		T	C	234	101	7	0.43736	1	0.168129
rs1357071	iSELECT	36567376		C	T	233	101	7	0.437634	0.997076	0.168622
rs11129723	iSELECT	36572905		C	A	234	101	7	0.43736	1	0.168129
rs1521268	iSELECT	36609993		C	A	234	101	7	0.43736	1	0.168129
rs1402563	iSELECT	36611158		C	T	234	101	7	0.43736	1	0.168129
rs1464412	iSELECT	36611910		T	C	107	173	62	0.659782	1	0.434211
rs17248901	iSELECT	36622465		C	T	234	101	7	0.43736	1	0.168129
rs6780039	iSELECT	36630641		G	C	192	129	14	0.223272	0.979532	0.234328
rs4431050	TaqMan	36855688	LBA1 Intron 8	A	G	275	66	2		1	0.102041
rs1800734	iSELECT	37009950	EPM2AIP1/MLH1	A	G	219	114	9	0.227407	1	0.192982
rs1800734	TaqMan	37009950	EPM2AIP1/MLH1	A	G	220	113	9		1	0.19152
rs1799977	TaqMan	37028572	MLH1 Exon 8 (I219V)	G	A	154	152	31		0.98538	0.317507
rs9876116	TaqMan	37058744	MLH1 Intron 14 (IVS14-19)	G	A	106	167	70		1	0.447522
rs749072	iSELECT	37071028	LRRFIP2 Intron 26 (IVS26-18)	C	T	199	128	15	0.364369	1	0.230994
rs13098279	iSELECT	37207462		A	G	222	111	9	0.375215	1	0.188596
rs10510691	iSELECT	37500765	ITGA9	C	T	261	72	9	0.153114	1	0.131579
SEA
snp	enzyme	chr_position_126	gene_126	minorAllele-B	majorAllele-A	AA	AB	BB	hwe	call rate for controls per enzyme	minor allele freq
rs6781630	iSELECT	36561025	STAC	T	G	454	169	16	1	1	0.157277
rs6550425	iSELECT	36566207		A	G	177	316	146	0.873942	1	0.475743
rs11716822	iSELECT	36566673		G	A	454	169	16	1	1	0.157277
rs1357069	iSELECT	36567042		G	A	454	169	16	1	1	0.157277
rs1357070	iSELECT	36567136		T	C	454	169	16	1	1	0.157277
rs1357071	iSELECT	36567376		C	T	449	168	17	0.767143	0.992175	0.159306
rs11129723	iSELECT	36572905		C	A	454	168	17	0.765996	1	0.158059
rs1521268	iSELECT	36609993		C	A	454	168	16	0.881396	0.998435	0.15674
rs1402563	iSELECT	36611158		C	T	454	169	16	1	1	0.157277
rs1464412	iSELECT	36611910		T	C	183	318	138	1	1	0.464789
rs17248901	iSELECT	36622465		C	T	449	174	16	1	1	0.161189
rs6780039	iSELECT	36630641		G	C	382	216	27	0.722868	0.978091	0.216
rs1800734	iSELECT	37009950	EPM2AIP1/MLH1	A	G	375	234	30	0.435572	1	0.230047
rs749072	iSELECT	37071028	LRRFIP2	C	T	342	259	38	0.260721	1	0.262128
rs13098279	iSELECT	37207462		A	G	381	229	29	0.497704	1	0.22457
rs10510691	iSELECT	37500765	ITGA9	C	T	480	142	17	0.130984	1	0.137715

## Sheet: Genotype Validation
rs1800734		TaqMan
		AA	AB	BB
Affymetrix	AA	91	0	1
	AB	3	634	3
	BB	0	4	1148
